# Supplementary material for: An ACE2-Alamandine Axis Modulates the Cardiac Performance of the Goldfish Carassius auratus via the NOS/NO System
Source: MDPI journal article supplement (doi:10.3390/antiox11040764), 2022-04-12
Supplement: s1 [file s1]

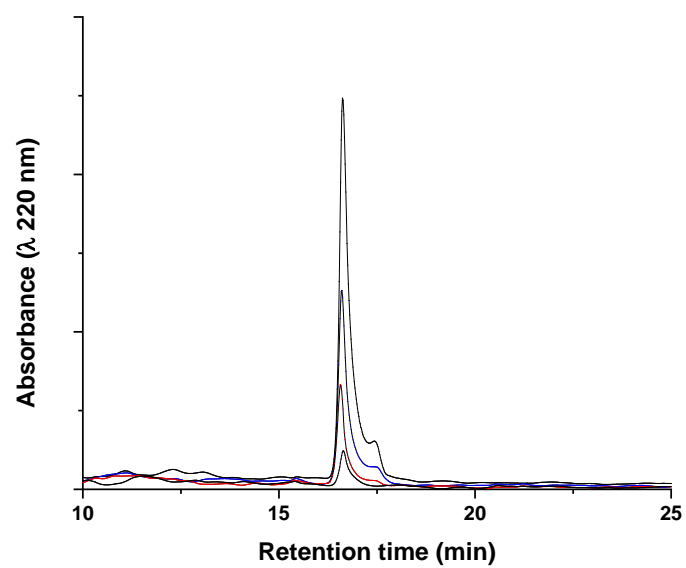

**Supplementary Figure S1.** Chromatograms showing Alamandine standard at different concentrations.

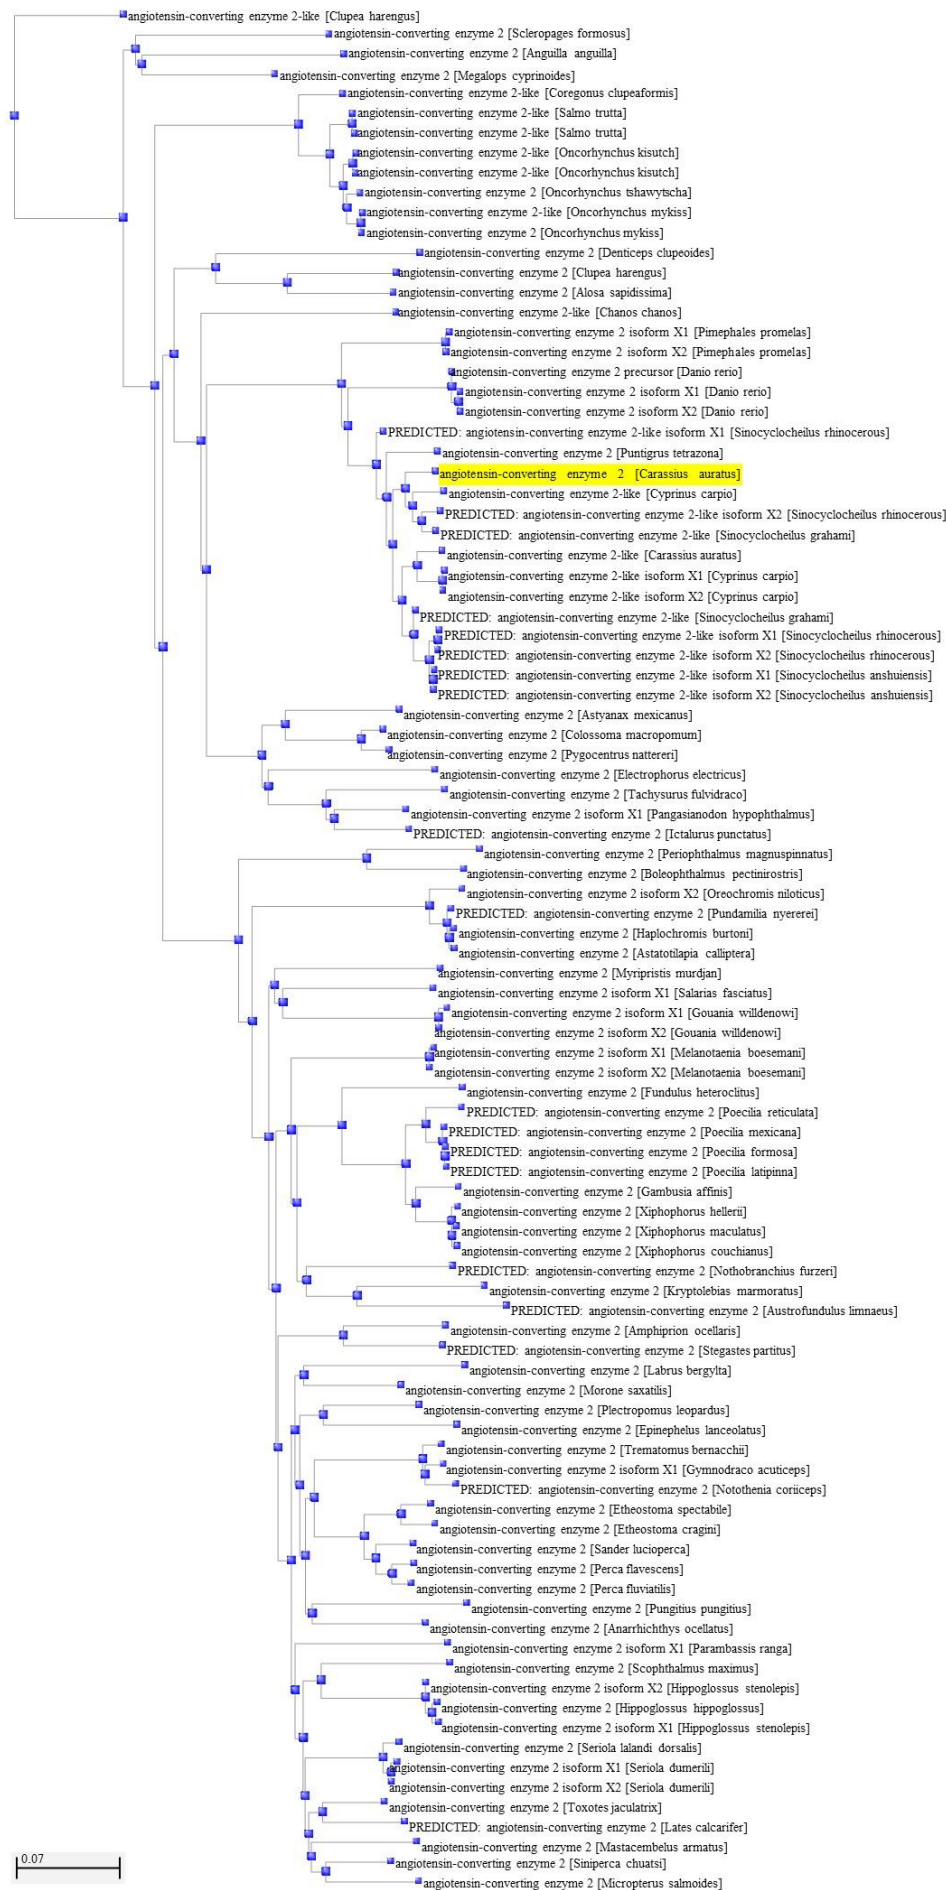

**Supplementary Figure S2.** Amino acid sequence alignment of teleost ace2 and ace2-like protein isoforms by NCBI BLAST. The phylogenetic tree (built with Neighbor Joining method) comprises 95 sequences from the result of processing (by BLASTP) the ace2 reference protein sequence of *C. auratus* (Acc. N. XP\_026131313.1) for matching the *refseq\_protein* database, subset of Teleostei (taxid: 32443).
